# Supplementary material for: In vivo transplantation of 3D encapsulated ovarian constructs in rats corrects abnormalities of ovarian failure
Source: PubMed Central journal article supplement (PMC5717171; doi:10.1038/s41467-017-01851-3), 2017-12-05
Supplement: 41467_2017_1851_MOESM1_ESM.pdf [file 41467_2017_1851_MOESM1_ESM.pdf]

Supplementary figure 1

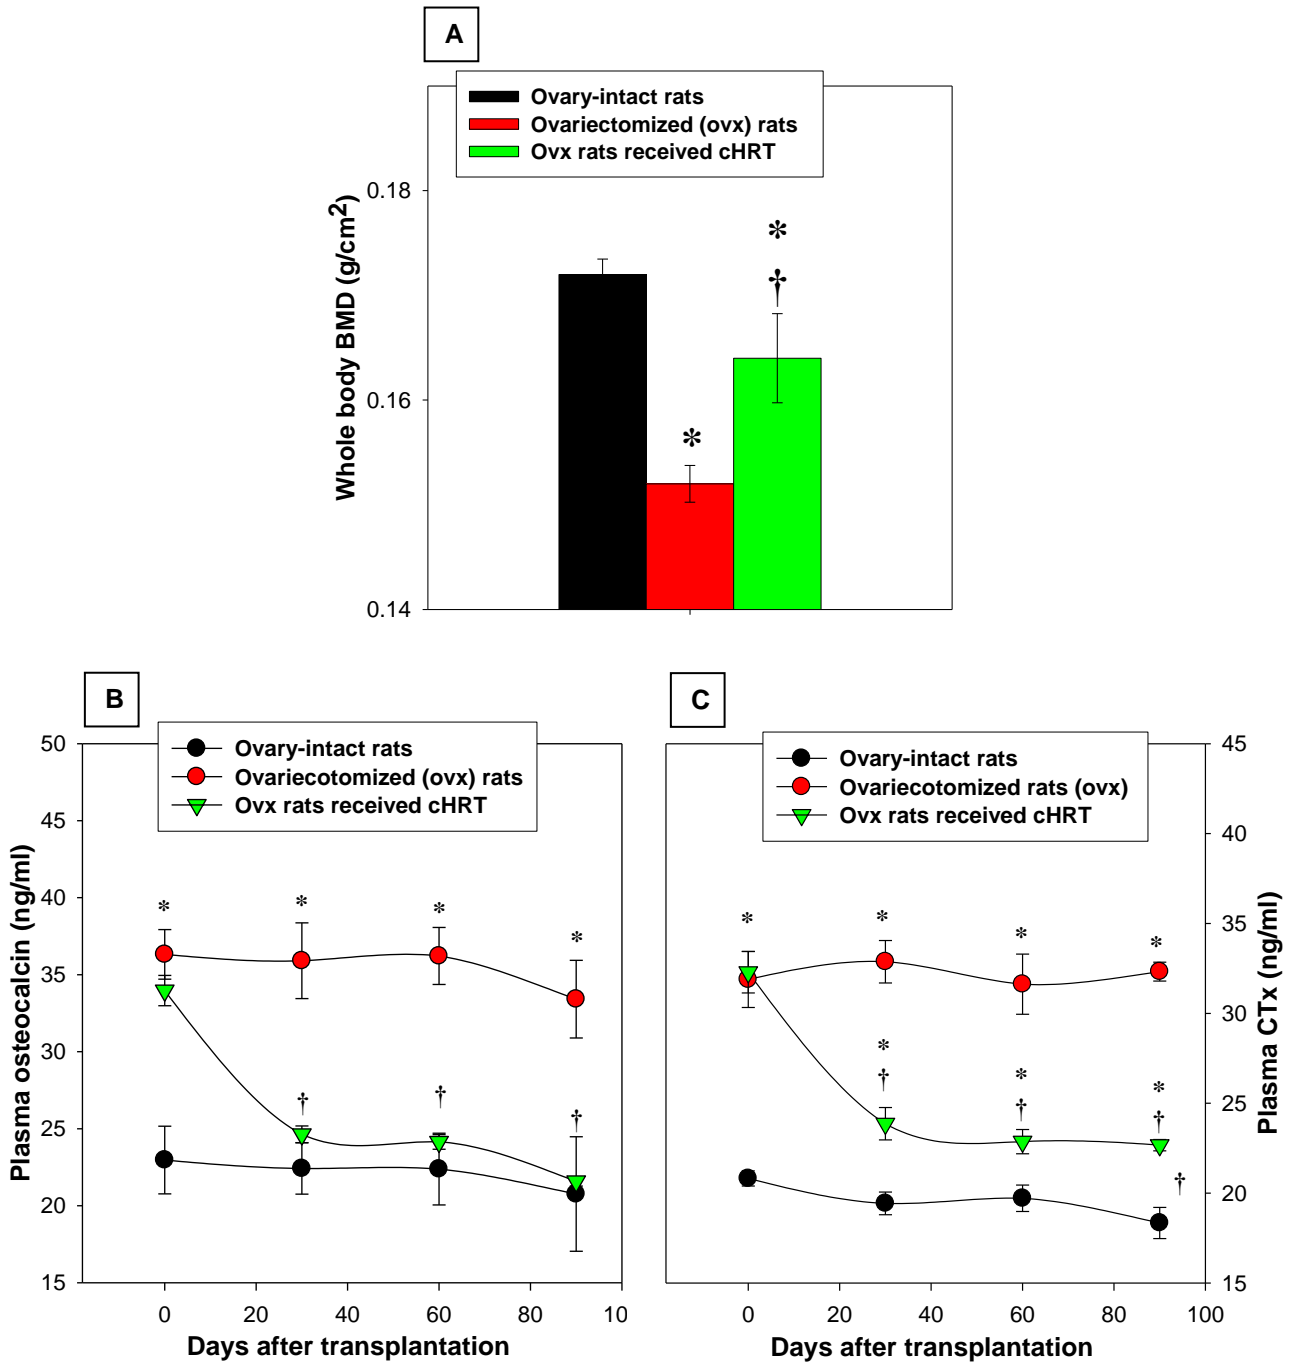

**Whole body BMD and Biomarkers of bone metabolism.** (A) Quantitative DXA scan (B) plasma osteocalcin and (C) C-telopeptide of collagen levels during the study period of 90 days in ovariectomized rats implanted with ovarian cell constructs compared to ovary-intact rats and untreated ovariectomized groups. Each data point represents mean  $\pm$  SEM of 10 values. Statistics: one-way ANOVA followed by Student-Newman-Keuls *post hoc* analysis. \* indicates significance  $P < 0.05$  compared to ovary-intact rats; † indicates significance  $P < 0.05$  compared to ovariectomized rats. The figures represent data from one of three separate experiments.

## Supplementary figure 2

### Ca<sup>++</sup> - microcapsules

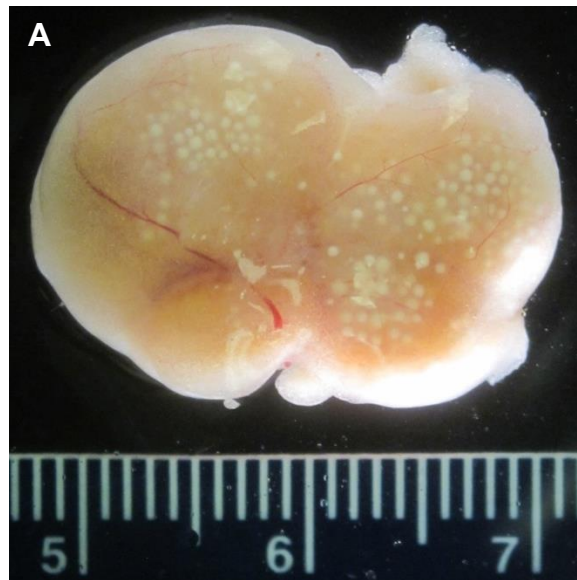

### Sr<sup>++</sup> - microcapsules

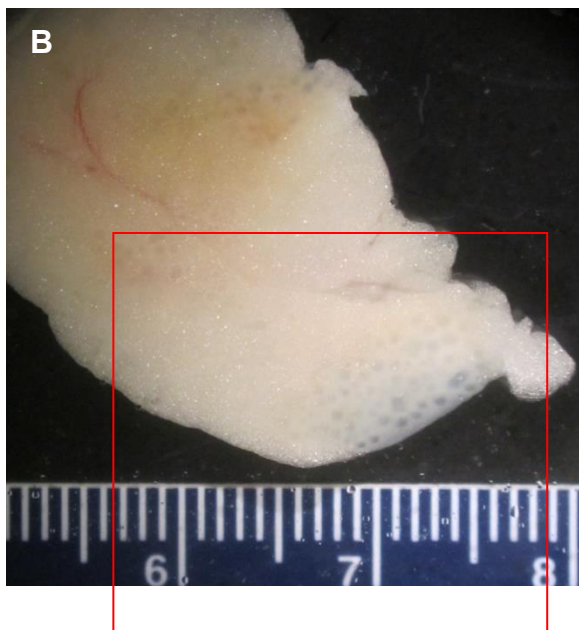

### Box enlarged

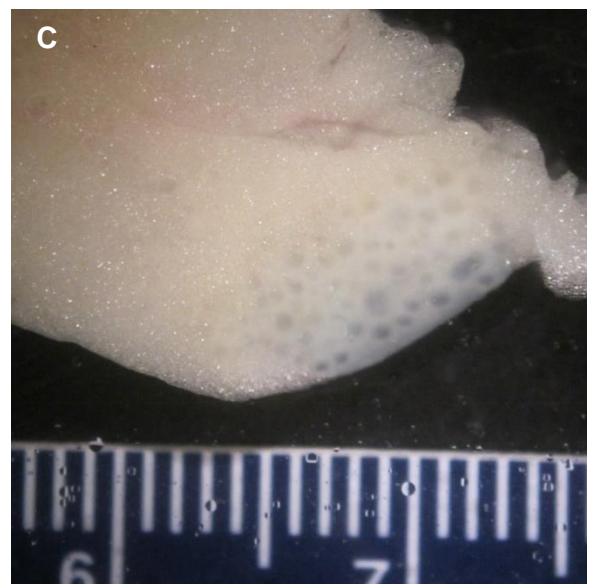

**Images of constructs explanted after 90 days in an omental pouch.** Explants for constructs using Ca<sup>++</sup> (A) or Sr<sup>++</sup> (B) as crosslinker. Image (A) is consistent with the image shown in Figure 1D, where evidence of calcification was observed. However, (B) indicates absence of calcification with the use of the Sr<sup>++</sup> crosslinker. An expanded view of the explants from Sr<sup>++</sup> crosslinked alginate further evidences the lack of calcification as indicated by the more translucent appearance of the explant (C).

**Supplementary table 1**

|                            | Ovary-intact              | Ovx                       | Ovx+10µg E <sub>2</sub>   | Ovx+50µg E <sub>2</sub>   | Ovx+2mg P <sub>4</sub>    | Ovx+10µg E <sub>2</sub> +2mg P <sub>4</sub> | Ovx+50µg E <sub>2</sub> +2mg P <sub>4</sub> | Ovx + cHRT                  |
|----------------------------|---------------------------|---------------------------|---------------------------|---------------------------|---------------------------|---------------------------------------------|---------------------------------------------|-----------------------------|
| Bone volume fraction (%)   | 44.85 ± 0.53 <sup>a</sup> | 14.94 ± 1.69 <sup>b</sup> | 23.65 ± 0.29 <sup>b</sup> | 30.55 ± 1.11 <sup>c</sup> | 16.65 ± 1.35 <sup>b</sup> | 24.52 ± 1.33 <sup>b</sup>                   | 30.89 ± 1.78 <sup>c</sup>                   | 32.71 ± 1.01 <sup>c</sup>   |
| Trabecular number (1/mm)   | 4.127 ± 0.04 <sup>a</sup> | 1.992 ± 0.12 <sup>b</sup> | 2.903 ± 0.07 <sup>c</sup> | 3.334 ± 0.09 <sup>c</sup> | 2.240 ± 0.16 <sup>b</sup> | 2.953 ± 0.07 <sup>c</sup>                   | 3.264 ± 0.09 <sup>c</sup>                   | 3.249 ± 0.13 <sup>c</sup>   |
| Trabecular thickness (µm)  | 101.6 ± 0.46 <sup>a</sup> | 74.33 ± 4.07 <sup>b</sup> | 81.52 ± 1.52 <sup>b</sup> | 91.58 ± 1.06 <sup>c</sup> | 74.28 ± 1.91 <sup>b</sup> | 82.93 ± 3.14 <sup>b</sup>                   | 94.43 ± 3.13 <sup>a,c</sup>                 | 91.35 ± 2.86 <sup>a,c</sup> |
| Trabecular separation (µm) | 125.1 ± 2.19 <sup>a</sup> | 432.8 ± 33.2 <sup>b</sup> | 263.5 ± 7.12 <sup>c</sup> | 209.1 ± 8.99 <sup>d</sup> | 379.2 ± 32.5 <sup>b</sup> | 256.4 ± 10.4 <sup>c</sup>                   | 212.6 ± 11.6 <sup>d</sup>                   | 206.5 ± 11.6 <sup>d</sup>   |

**Restoration of femur bone trabecular micro-architecture in ovx rats by constructs.** Each data point represents mean ± SEM of 10 values. Different letters above the values represents statistical significance at P<0.05 between the groups. Same letters denote no significant difference between the groups as determined by one-way ANOVA followed by Student-Newman-Keuls *post hoc* analysis. Ovx – Ovariectomized; E<sub>2</sub> – 17β-estradiol; P<sub>4</sub> - progesterone
